# Supplementary material for: Integrative omics analysis identifies biomarkers of septic cardiomyopathy
Source: PubMed Central journal article supplement (PMC11567565; doi:10.1371/journal.pone.0310412), 2024-11-15

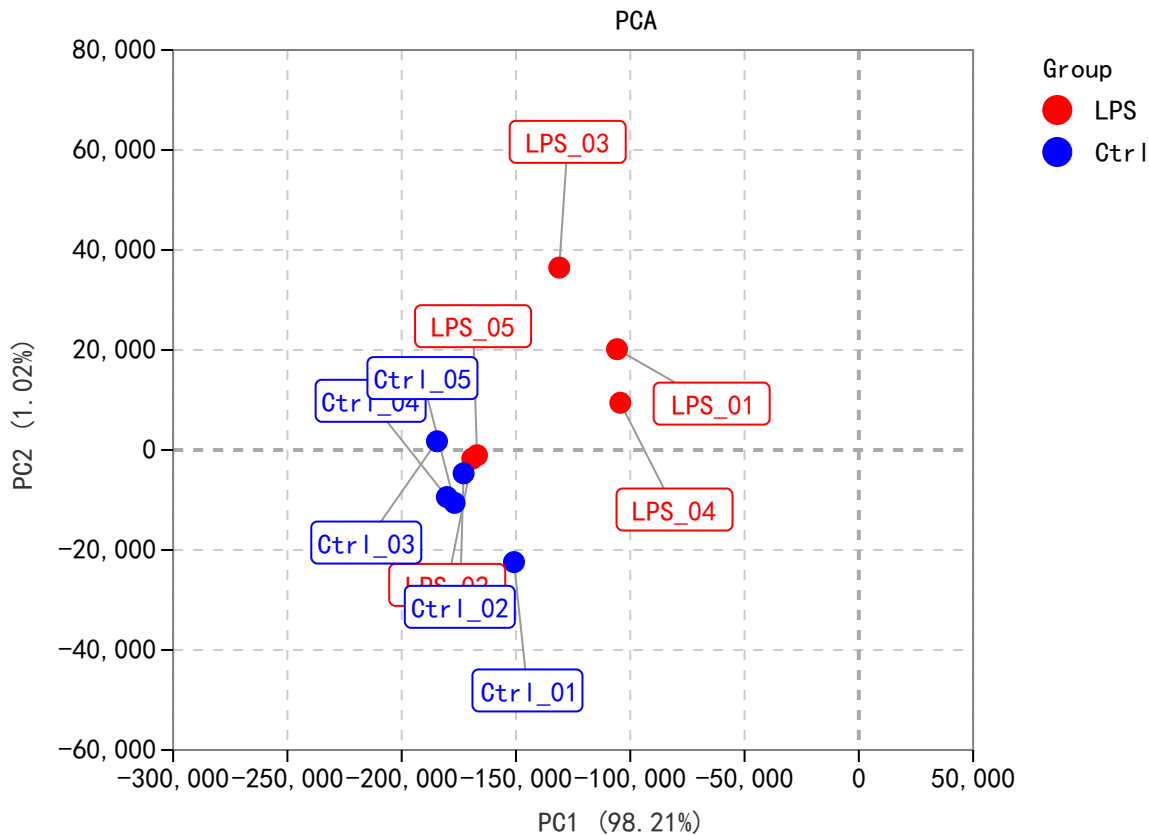

Supplement: pone.0310412.s001.pdf [file pone.0310412.s001.pdf]
