# Supplementary material for: Integrative omics analysis identifies biomarkers of septic cardiomyopathy
Source: PubMed Central journal article supplement (PMC11567565; doi:10.1371/journal.pone.0310412), 2024-11-15

FGA 95 kDa

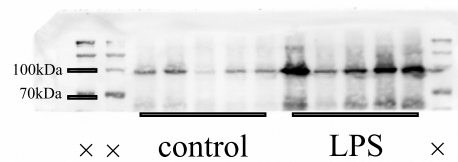

A2M 180 kDa

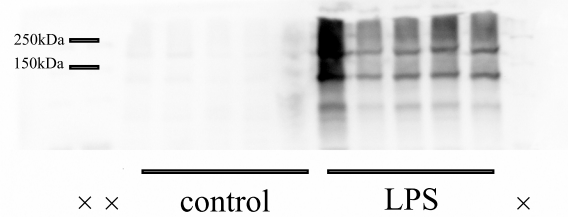

Orm1 47 kDa

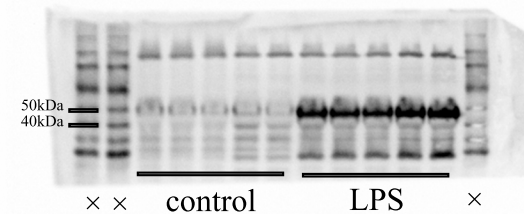

GAPDH 36 kDa

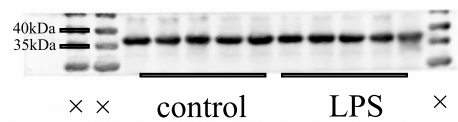

GAPDH 36 kDa

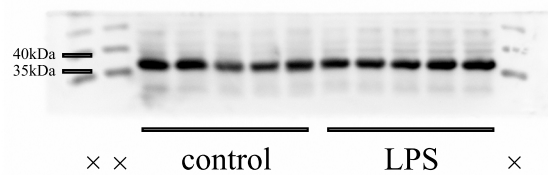

GAPDH 36 kDa

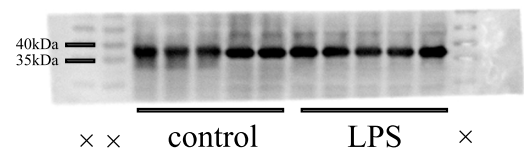

Hspb1 27 kDa

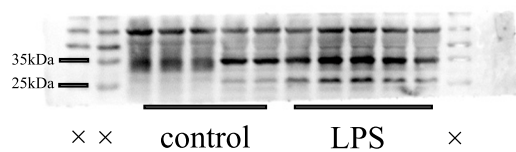

C2 83 kDa

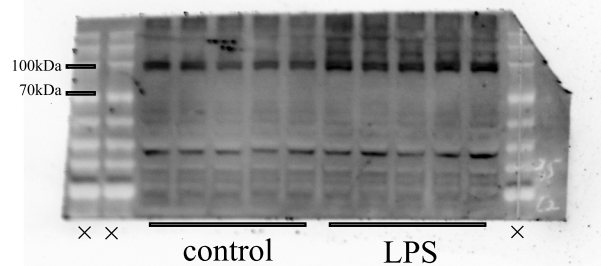

Hp 36 kDa

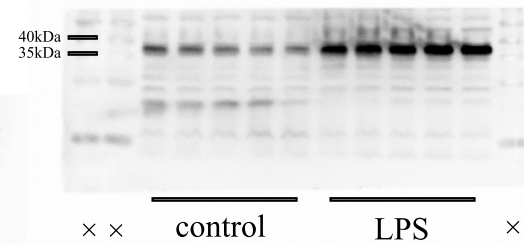

GAPDH 36 kDa

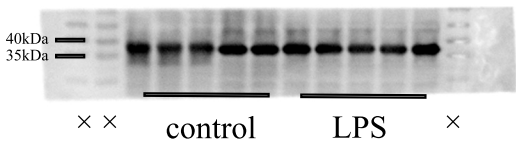

GAPDH 36 kDa

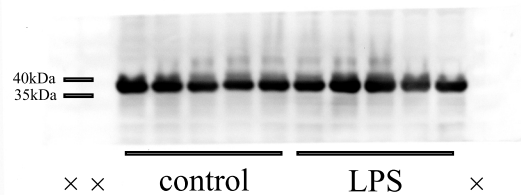

GAPDH 36 kDa

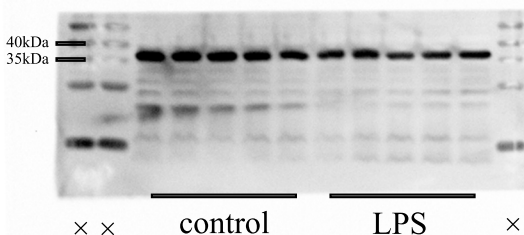

Supplement: pone.0310412.s002.pdf [file pone.0310412.s002.pdf]
